# Supplementary material for: Enhanced hydrogen evolution and symmetric supercapacitor performance of a Ru-doped multiphase WS2 electrode
Source: Royal Society of Chemistry journal article supplement (doi:10.1039/d3ta06541c), 2023-11-24
Supplement: d3ta06541c1.pdf [file d3ta06541c1.pdf]

## Supporting Information

### Enhanced Hydrogen Evolution and Symmetric Supercapacitor Performance of Ru-doped Multiphase WS<sub>2</sub> Electrode

Pamula Siva, and Kuraganti Vasu\*

E-mail: kuraganti.vasu@vit.ac.in

P. Siva, and K. Vasu

Department of Physics, School of Advanced Sciences, Vellore Institute of Technology, Vellore,  
Tamilnadu-632014, India



Figure S1 : EDX images of (a) 2H-WS<sub>2</sub> and (b) Ru doped 2H/1T-WS<sub>2</sub>-10 samples



Figure S2 : The high-angle annular dark-field scanning TEM (HAADF-STEM) image with corresponding elemental mapping for 2H/1T-WS<sub>2</sub>-10 sample showing W, S and Ru atoms in the sample



Figure S3: Chronoamperometry durability test of  $2\text{H-WS}_2$  and  $2\text{H/1T-WS}_2\text{-10}$  catalyst



Figure S4 : CV curves of Ru doped  $\text{WS}_2$  electrodes measured at different scan rate (a)  $2\text{H-WS}_2$ , (b)  $2\text{H-WS}_2-2$ , (c)  $2\text{H-WS}_2-6$  and (d)  $2\text{H/1T-WS}_2-10$  samples
